# Supplementary material
Source: MDPI journal article supplement (https://www.mdpi.com/2071-1050/13/13/7129)
Supplement: s1 [file s1 › sustainability-1246158-supplementary.pdf]

**Table S1.** Dimensions, items and descriptors of the Instrument to know the degree to which EES is incorporated into HEIs.

| Dimensions             | Items                                                                                                                                                                                                                                                                                                                                                                                                                                                                                                                                                                                                                                                                                                                                                                                                                                                                                                                                                                                                                                                                                                                                                                                                                                                                                                                                                                                                                                                                                                                                                                                                                                                                                                                                                                                                                                                                                                                                                                                                                                                                                                                                                                                                                                                                                                                                                                                                                                                                                                                                                                                                                                                                                                                                                                                                                                                                                                                                                                                                                                                                                                                                           |
|------------------------|-------------------------------------------------------------------------------------------------------------------------------------------------------------------------------------------------------------------------------------------------------------------------------------------------------------------------------------------------------------------------------------------------------------------------------------------------------------------------------------------------------------------------------------------------------------------------------------------------------------------------------------------------------------------------------------------------------------------------------------------------------------------------------------------------------------------------------------------------------------------------------------------------------------------------------------------------------------------------------------------------------------------------------------------------------------------------------------------------------------------------------------------------------------------------------------------------------------------------------------------------------------------------------------------------------------------------------------------------------------------------------------------------------------------------------------------------------------------------------------------------------------------------------------------------------------------------------------------------------------------------------------------------------------------------------------------------------------------------------------------------------------------------------------------------------------------------------------------------------------------------------------------------------------------------------------------------------------------------------------------------------------------------------------------------------------------------------------------------------------------------------------------------------------------------------------------------------------------------------------------------------------------------------------------------------------------------------------------------------------------------------------------------------------------------------------------------------------------------------------------------------------------------------------------------------------------------------------------------------------------------------------------------------------------------------------------------------------------------------------------------------------------------------------------------------------------------------------------------------------------------------------------------------------------------------------------------------------------------------------------------------------------------------------------------------------------------------------------------------------------------------------------------|
| Institutional Identity | <p>1. To what degree is the environmental and the sustainability perspective a priority for the HEI, and therefore, is it part of the institutional policy and is it present in its creation decree, institutional regulations and / or strategic plans?</p> <p>1. The environmental perspective for sustainability is not explicitly considered as part of institutional policy.</p> <p>2. The environmental perspective for sustainability is explicitly contemplated in at least one of its institutional regulations (relating to the substantive functions of the Institution).</p> <p>3. The environmental perspective for sustainability is present as a priority in institutional strategic plans.</p> <p>4. The HEI clearly specifies, as a priority, within its institutional mission and vision the environmental and the sustainability perspective.</p> <p>5. The HEI considers the environmental and the sustainability perspective as a priority in all of its governing documents (strategic plans, regulations, mission and vision).</p> <p>2. What is the level of budget allocation that the HEI allocates for the development of environmental and sustainability projects?</p> <p>1. The HEI does not make a budget allocation for the development of activities and projects related to the environment and sustainability.</p> <p>2. The HEI allocates resources to carry out awareness-raising and dissemination events on environmental issues for sustainability (fairs, exhibitions, tianguis (open-air market), workshops, short courses) and allocates resources for research programs on the environment.</p> <p>3. The HEI allocates resources for research programs on the environment and sustainability. It has an environmental management system in place. It conducts awareness-raising and dissemination events on environmental issues and sustainability (fairs, exhibitions, tianguis (open-air market), workshops, short courses).</p> <p>4. The HEI allocates resources for research programs on the environment and sustainability. It has an environmental management system in place. It conducts awareness-raising and dissemination events on environmental issues and sustainability (fairs, exhibitions, tianguis (open-air market), workshops, short courses). It properly disposes of its hazardous waste.</p> <p>5. The HEI has resources for the implementation of an Institutional program in charge of promoting the environmental and the sustainability perspective (Institutional Environmental Plan) and resources for research programs on the environment and sustainability. It has a functioning environmental management system, properly disposing of its hazardous waste, conducts awareness-raising and dissemination events on environmental and sustainability issues (fairs, exhibitions, tianguis (open-air market), workshops, short courses). It holds academic training events in EES, congresses, symposia, seminars, graduate programs among others. It allocates expenses on publications (books, periodicals, educational materials) and reforestation days.</p> |

---

3. To what degree does the HEI implement an environmental management system (EMS)?

1. The HEI does not have an Institutional Environmental Management Program.
2. The HEI has a program for the responsible use of electricity, paper and water within the facilities.
3. The HEI has a program for the management of solid urban waste, waste of special management (construction waste) and comprehensive management of hazardous waste (HBIW).
4. The HEI has a sustainable mobility system, a responsible consumption and green purchasing program, and a sustainable construction.
5. The HEI disseminates the environmental management system to the society in general, it participates in the formation and training of the management system and it has committees for the prevention and management of health risks and it takes care of the physical heritage of the Institution.

4. To what degree does the HEI implement a civil protection program, a prevention of risks to the health, the environment and heritage?

1. The HEI carries out surveillance and monitoring activities to prevent risks or threats to vulnerable sectors of the academic community. It has equipment for prevention such as fire extinguishers and protective helmets.
2. The HEI carries out activities to prevent risks or threats in the event of an event that may affect its assets, compromises its services, or affects the environment. It has equipment such as fire extinguishers, suitable clothing, helmets and protective masks, the safe zones and routes for emergency exits are clearly marked.
3. The HEI has a promotion and planning program for the management of contingencies, each responsible area has adequate infrastructure, equipment and tools (fire extinguishers, communication radios, helmets, adequate clothing), to reduce the impact of explosions, dissipation of dangerous gases, or release of pollutants into the environment.
4. The HEI, in addition to having the aforementioned components, integrates commissions for the management of contingencies and promotes their regular training on the proper use of protection equipment and tools and the implementation of general security protocols, clearly defined evacuation routes and safe zones for the university community.
5. The HEI has a program and commissions for the management of contingencies where the procedures and protocols to be followed in any eventuality are explicitly established. This program is aimed at the entire university community through which self-protection, planning and constant training of specialized care brigades are constantly promoted. Programs are periodically reviewed for adjustments if necessary.

---

Teaching

5. To what degree does the HEI mainstream the environmental and sustainable perspective in its Study Plans (SP)?

1. The Institution's educational programs do not incorporate any subject related to environmental issues.
  2. At least one Educational Program (EP) incorporates some compulsory or optional subject focused on environmental content for sustainability.
  3. At least one EP has a terminal specialization specifically in environment and sustainability.
-

---

4. At least one EP has the environmental and sustainability dimension in all its subjects in an environmental mainstream way.

5. The HEI incorporates the environmental approach in all its undergraduate and postgraduate SPs in an environmental mainstream way, and has a teacher training program

6. At what level does the HEI implement teacher training and updating strategies to strengthen the environmental and sustainability perspective in an environmental mainstream way in teaching and SP?

1. The HEI does not have a program or activities that allow teachers to train in environmental and sustainability issues.

2. The HEI promotes some academic events and activities for teachers to receive training in the field of environmental issues with a focus on sustainability.

3. The HEI has a training strategy for its teachers on environmental and sustainability issues through training activities offered by other institutions.

4. The HEI has a permanent teacher training program on environmental and sustainability issues specifically designed for the context in which they find themselves.

5. The HEI has an evaluation and monitoring program for its teachers trained through its own program on environmental and sustainability issues.

7. To what degree does the HEI have alternatives for continuous training (CF) in environmental and sustainability issues?

1. The HEI does not have a continuous education program on environmental issues for sustainability.

2. The HEI has a continuous education program that consists of workshops, short courses and seminars on environmental and sustainability issues aimed at student teachers, graduates, and the society in general.

3. The HEI has a continuous education program that consists of workshops, short courses and seminars aimed at priority programs and projects for the HEI such as curricular greening, Environmental Management program, etc. aimed at teachers and the academic community in general.

4. The HEI has a continuous education program that, in addition to offering short courses and workshops, it also offers graduate programs aimed at priority programs and projects for the HEI such as curricular greening, Environmental Management program, Environmental Impact Assessment, Climate Change, etc. aimed at teachers and the academic community in general.

5. The HEI has a program for evaluating and monitoring the results of its continuous education program on environment and sustainability.

8. To what degree does the HEI have a SP in alternative modalities on environmental and sustainability issues?

1. The HEI does not have information and communication technologies to carry out educational activities and programs in alternative modalities.

2. The HEI has a program of seminars on environmental and sustainability issues in alternative modalities.

---

|               |                                                                                                                                                                                                                                                                                                                                                                                                                                                                                                                                                                                                                                                                                                                                                                                                                                                                                                                                                                                                                                                                                                                                                                                                                                                                                                                                                                                                                                                                                                                                                                                                                                                                                                                                                                                                                                                                                                                                                                                                                                                                                                                                                                                                                                                                                                                                                                                                                                                                                                                                                                                                                                                                                                                                                                                                                                                       |
|---------------|-------------------------------------------------------------------------------------------------------------------------------------------------------------------------------------------------------------------------------------------------------------------------------------------------------------------------------------------------------------------------------------------------------------------------------------------------------------------------------------------------------------------------------------------------------------------------------------------------------------------------------------------------------------------------------------------------------------------------------------------------------------------------------------------------------------------------------------------------------------------------------------------------------------------------------------------------------------------------------------------------------------------------------------------------------------------------------------------------------------------------------------------------------------------------------------------------------------------------------------------------------------------------------------------------------------------------------------------------------------------------------------------------------------------------------------------------------------------------------------------------------------------------------------------------------------------------------------------------------------------------------------------------------------------------------------------------------------------------------------------------------------------------------------------------------------------------------------------------------------------------------------------------------------------------------------------------------------------------------------------------------------------------------------------------------------------------------------------------------------------------------------------------------------------------------------------------------------------------------------------------------------------------------------------------------------------------------------------------------------------------------------------------------------------------------------------------------------------------------------------------------------------------------------------------------------------------------------------------------------------------------------------------------------------------------------------------------------------------------------------------------------------------------------------------------------------------------------------------------|
|               | <p>3. The HEI has educational programs on a technical level on environmental and sustainability issues in alternative modalities.</p> <p>4. The HEI has educational programs on a bachelor's level on environmental and sustainability issues in alternative modalities.</p> <p>5. The HEI has postgraduate educational programs on environmental and sustainability issues in alternative modalities.</p>                                                                                                                                                                                                                                                                                                                                                                                                                                                                                                                                                                                                                                                                                                                                                                                                                                                                                                                                                                                                                                                                                                                                                                                                                                                                                                                                                                                                                                                                                                                                                                                                                                                                                                                                                                                                                                                                                                                                                                                                                                                                                                                                                                                                                                                                                                                                                                                                                                            |
| Investigation | <p>9. At what level is there participation of students and teachers in EES projects aimed at training various sectors of society?</p> <p>1. The Institution does not implement environmental education activities.</p> <p>2. Sporadic environmental education activities are implemented for groups of children who visit the facilities of the HEI.</p> <p>3. The HEI annually carries out campaigns to promote environmental education activities to groups of people who live in the Institution's areas of influence.</p> <p>4. On a regular basis, environmental education activities are scheduled for the general public and visits are made to laboratories, scientific collections and green areas for the development of various topics related to the environment.</p> <p>5. There is a scheduling of environmental education activities aimed at different sectors of the society where both students and teachers intervene in various issues related to the environment.</p> <p>10. Within the HEI, to what level are there multidisciplinary research groups that work on priority themes and/or axes for the environment and sustainability?</p> <p>1. The HEI does not have researchers who develop research projects on environmental issues.</p> <p>2. The HEI has researchers who develop, in isolation, research projects on priority themes and/or axes in the environment for sustainability.</p> <p>3. The HEI has multidisciplinary research groups that develop research programs on environmental issues for sustainability.</p> <p>4. The HEI has groups of multidisciplinary researchers who develop research projects on priority themes and/or axes for the environment and sustainability.</p> <p>5. The HEI has multidisciplinary research groups that develop research projects on priority themes and axes for the environment and sustainability, they are made up of consolidated academic bodies recognized in Mexico by the "Secretaría de Educación Pública (SEP)".</p> <p>11. Does the HEI have a research program to recognize, protect and promote systems of construction of knowledge, know-how and local culture as factors that promote sustainability, and what is its degree of development?</p> <p>1. The HEI does not conduct research related to the traditional knowledge of local indigenous communities.</p> <p>2. The HEI conducts research on the recognition of local know-how that promotes sustainability in the Institution's area of influence. Some researchers do basic research on this. That is, without having a dialogue with the holders of knowledge.</p> <p>3. The intellectual value of traditional indigenous knowledge is recognized and promoted. The recovery and strengthening of significant local know-how for sustainability is sought through research projects.</p> |

|                             |                                                                                                                                                                                                                                                                                                                                                                                                                                                                                                                                                                                                                                                                                                                                                                                                                                                                                                                                                                                                                                                                                                                                                                                                                                                                                                                                                                                                                                                                                                                                                                                                                                                                                                                                                                    |
|-----------------------------|--------------------------------------------------------------------------------------------------------------------------------------------------------------------------------------------------------------------------------------------------------------------------------------------------------------------------------------------------------------------------------------------------------------------------------------------------------------------------------------------------------------------------------------------------------------------------------------------------------------------------------------------------------------------------------------------------------------------------------------------------------------------------------------------------------------------------------------------------------------------------------------------------------------------------------------------------------------------------------------------------------------------------------------------------------------------------------------------------------------------------------------------------------------------------------------------------------------------------------------------------------------------------------------------------------------------------------------------------------------------------------------------------------------------------------------------------------------------------------------------------------------------------------------------------------------------------------------------------------------------------------------------------------------------------------------------------------------------------------------------------------------------|
|                             | <p>4. The HEI generates spaces that serve as a bridge for research around the recognition of local know-how that promotes sustainability from a collective exercise through dialogue with the social actors involved.</p> <p>5. The HEI disseminates the products derived from the research (referred above) through scientific publications and other products such as documentaries, educational materials, where the members of the community participate as main actors in the generation of knowledge.</p> <p>12. To what level is there a risk assessment for the use of certain technologies, as well as the development and promotion of environmentally friendly and socially responsible alternatives in the HEI?</p> <p>1. The Institution does not carry out research aimed at the development of new technologies to address environmental problems in any context.</p> <p>2. The HEI works on lines of investigation around the development of new technologies to solve some local environmental problems, such as wastewater treatment systems.</p> <p>3. The HEI has lines of investigation that assess health risks, the environment and heritage with the technologies currently used in the Institution and in its area of influence (use of chemical substances in the laboratory, clinical waste, emissions into the atmosphere).</p> <p>4. There are research groups in the institution on the application and transfer of environmentally friendly technologies (design of prototypes to optimize the use of water, paper, energy, etc.)</p> <p>5. Lines of investigation and application of knowledge were developed aiming at developing environmentally friendly patents and prototypes in an environment of social responsibility.</p> |
| Extension and Dissemination | <p>13. Does the HEI have university extension programs that address priority environmental and sustainability issues in its area of influence, and what degree of development do they have?</p> <p>1. The HEI does not have university extension activities or programs related to the environmental axis.</p> <p>2. The HEI has a department or university extension area for the attention of projects related to the environmental axis in the local and regional context.</p> <p>3. The HEI executes projects to promote regional development of high priority towards the environmental conditions of the surroundings.</p> <p>4. The HEI has inter-institutional collaboration programs of university extension for the attention of diverse environmental problems both in the regional and national context.</p> <p>5. The HEI has a jointly strategic plan with academic and governmental institutions, in addition to linkage and agreements with various non-governmental organizations for the development of projects to promote local, regional and national development on the environmental axis.</p> <p>14. To what degree does the HEI have dissemination programs and projects on environmental and sustainability issues?</p> <p>1. The HEI does not carry out, nor participate in dissemination programs on environmental issues for sustainability.</p>                                                                                                                                                                                                                                                                                                                                                                                      |

- 
2. The HEI has educational spaces such as radios, TV, social networks, botanical gardens, scientific collections, herbariums, nurseries and interpretive trails that promote environmental education exclusively to the academic community.
  3. The HEI has educational spaces such as radios, TV, social networks, botanical gardens, scientific collections, herbariums, nurseries and interpretive trails that promote environmental education to the academic community, but they are also open to the general public.
  4. Dissemination is carried out through the organization of festivals, exhibitions of artistic works, cinema and theater, it is complemented by tours of educational spaces such as nurseries, botanical gardens and interpretive trails for the general public.
  5. Academic events are organized such as forums, congresses, symposiums, and there is extensive use of botanical gardens, nurseries and interpretive trails that promote environmental education outside the Institution.

15. What is the level of participation of the HEI in public and social processes, to address sustainability?

1. The HEI does not participate in public consultation processes on issues related to the environment or that address some of the elements of sustainability.
2. Some teachers and students participate in public consultations on environmental issues. In addition, the HEI participates in the dissemination of public management instruments such as environmental laws, ecological regulations, and environmental management programs.
3. The HEI is part of an environmental advisory council in which it actively participates on a national level.
4. The HEI opens public consultations on priority environmental and sustainability issues on a government level that directly affect Mexican legislation.
5. The HEI has formed or is part of an advisory or consultative council on environmental matters in which it actively participates on an international level.

---

Linkage

16. To what degree does the HEI have social service (SS) programs, internships and practicums in environment and sustainability?

1. Students do not participate in social service programs, internships, and practicums on environmental issues.
  2. Students participate in social service projects, internships, or practicums on environmental issues. There is an accompaniment by teachers to the students who perform social services and practicums in environmental issues.
  3. There is a project of institutional scope for the realization of social services, internships and practicums for the students of the Institution on environmental issues.
  4. The HEI has collaboration agreements to carry out social services, internships and practicums in Institutions that work on the environmental axis (CONAFOR, CONABIO, CONANP, SEMARNAT, NGOs, educational and research institutions in Mexico).
  5. The HEI has an institutional program of academic practicums and exchanges with various sectors to work on environmental issues from the perspective of their own disciplines.
-

---

17. To what degree does the HEI participate in networks of (universities, with government agencies, civil societies, etc.) oriented towards the environment and sustainability?

1. The HEI does not participate in work networks, in care programs, regarding the environment for sustainability.
  2. The HEI promotes the creation of institutional networks between universities to address environmental issues.
  3. The HEI is part of institutional networks between universities and research centers on environmental issues aiming towards sustainability.
  4. The HEI participates in collaboration networks among academic institutions, government institutions and NGOs for the environment with a focus on sustainability.
  5. The HEI is part of an inter-institutional work network between multiple sectors that work on the environmental issue, including the government sector, NGOs, HEI, Research Institutions and private initiatives. They are organized on national and international contexts.
-
